# Supplementary material for: An exercise-based educational and motivational intervention after surgery can improve behaviors, physical fitness and quality of life in bariatric patients
Source: PubMed Central journal article supplement (PMC7595397; doi:10.1371/journal.pone.0241336), 2020-10-29
Supplement: pone.0241336.s001.pdf [file pone.0241336.s001.pdf]

| ID | GEN DER | AGE | WEIG HT | HEIG HT | BMI  | WC  | HC  | VO2 MAX | SQU AT | UPPE R LIMB STRE NGH T RIGH T | UPPE R LIMB STRE NGH T LEFT | SHO ULDE R ROM EXTE NSIO N RIGH T | SHO ULDE R ROM EXTE NSIO N LEFT | ELBO W ROM EXTE NSIO N RIGH T | ELBO W ROM EXTE NSIO N LEFT | ANKL E ROM FLEXI ON RIGH T | ANKL E ROM FLEXI ON LEFT | ANKL E ROM EXTE NSIO N RIGH T | ANKL E ROM EXTE NSIO N LEFT | KNEE ROM RIGH T | KNEE ROM LEFT | BES | IPAQ | ORW ELL | FRUI TS/D AY | VEGE TABL ES/D AY | CERE ALS/ DAY | SWEE TS/D AY | MEA T/WE EK | FISH/ WE EK | MILK, YOG URT AND DAIR Y PRO DUCT S/WE EK | EGGS /WEE K | BREA KFAST/WE EK |
|----|---------|-----|---------|---------|------|-----|-----|---------|--------|-------------------------------|-----------------------------|-----------------------------------|---------------------------------|-------------------------------|-----------------------------|----------------------------|--------------------------|-------------------------------|-----------------------------|-----------------|---------------|-----|------|---------|--------------|-------------------|---------------|--------------|-------------|-------------|-------------------------------------------|-------------|------------------|
| 1  | F       | 28  | 139     | 1,63    | 52,3 | 122 | 120 | 19,8    | 21     | 15                            | 15                          | 29                                | 27                              | 100                           | 100                         | 63                         | 65                       | 14                            | 10                          | 180             | 185           | 32  | 288  | 79      | 2            | 0                 | 2             | 1            | 5           | 1           | 7                                         | 0           | 0                |
| 2  | M       | 37  | 141     | 1,68    | 50,0 | 120 | 118 | 28,3    | 90     | 49                            | 46                          | 38                                | 41                              | 156                           | 177                         | 74                         | 68                       | 15                            | 14                          | 187             | 187           | 31  | 312  | 69      | 2            | 2                 | 2             | 2            | 5           | 0           | 2                                         | 1           | 0                |
| 3  | F       | 42  | 90      | 1,57    | 36,5 | 119 | 115 | 22,7    | 34     | 19                            | 19                          | 25                                | 23                              | 100                           | 100                         | 88                         | 84                       | 18                            | 18                          | 189             | 189           | 32  | 356  | 76      | 1            | 0                 | 3             | 1            | 3           | 2           | 5                                         | 2           | 2                |
| 4  | F       | 35  | 78      | 1,6     | 30,5 | 92  | 85  | 20,2    | 40     | 35                            | 34                          | 34                                | 37                              | 127                           | 127                         | 75                         | 70                       | 20                            | 20                          | 194             | 191           | 39  | 537  | 82      | 1            | 0                 | 3             | 2            | 4           | 1           | 5                                         | 4           | 5                |
| 5  | M       | 29  | 97      | 1,72    | 32,8 | 104 | 103 | 26,8    | 99     | 49                            | 46                          | 38                                | 39                              | 150                           | 150                         | 70                         | 72                       | 11                            | 12                          | 185             | 185           | 31  | 476  | 75      | 3            | 1                 | 2             | 2            | 1           | 1           | 0                                         | 4           | 0                |
| 6  | M       | 33  | 95      | 1,76    | 30,7 | 97  | 95  | 30,6    | 93     | 45                            | 44                          | 37                                | 38                              | 123                           | 120                         | 79                         | 75                       | 12                            | 16                          | 180             | 184           | 37  | 253  | 81      | 2            | 2                 | 3             | 2            | 6           | 1           | 13                                        | 3           | 7                |
| 7  | F       | 34  | 78      | 1,58    | 31,2 | 110 | 103 | 25,6    | 47     | 34                            | 32                          | 35                                | 35                              | 143                           | 143                         | 75                         | 70                       | 15                            | 15                          | 188             | 188           | 40  | 367  | 69      | 0            | 0                 | 2             | 2            | 3           | 0           | 2                                         | 2           | 0                |
| 8  | F       | 35  | 82      | 1,54    | 34,6 | 112 | 110 | 19,8    | 55     | 35                            | 35                          | 34                                | 36                              | 120                           | 120                         | 45                         | 55                       | 9                             | 10                          | 180             | 185           | 30  | 513  | 80      | 1            | 0                 | 3             | 1            | 4           | 2           | 3                                         | 3           | 0                |
| 9  | F       | 32  | 78      | 1,61    | 30,1 | 90  | 89  | 17,9    | 64     | 46                            | 45                          | 39                                | 39                              | 143                           | 156                         | 55                         | 62                       | 7                             | 10                          | 184             | 184           | 38  | 487  | 80      | 0            | 1                 | 2             | 2            | 4           | 3           | 10                                        | 5           | 5                |
| 10 | F       | 28  | 84      | 1,6     | 32,8 | 110 | 103 | 20,6    | 78     | 36                            | 35                          | 34                                | 36                              | 100                           | 100                         | 98                         | 91                       | 14                            | 15                          | 186             | 186           | 32  | 512  | 76      | 1            | 1                 | 1             | 2            | 4           | 1           | 5                                         | 2           | 0                |
| 11 | F       | 53  | 78      | 1,58    | 31,2 | 95  | 98  | 24,7    | 62     | 32                            | 31                          | 34                                | 37                              | 100                           | 100                         | 60                         | 70                       | 19                            | 22                          | 195             | 190           | 39  | 523  | 82      | 1            | 0                 | 3             | 1            | 2           | 2           | 15                                        | 0           | 7                |
| 12 | M       | 33  | 125     | 1,85    | 36,5 | 115 | 108 | 24,4    | 37     | 47                            | 45                          | 37                                | 38                              | 177                           | 170                         | 95                         | 90                       | 20                            | 20                          | 194             | 186           | 38  | 458  | 91      | 2            | 1                 | 2             | 2            | 3           | 3           | 14                                        | 1           | 7                |
| 13 | F       | 39  | 80      | 1,56    | 32,9 | 105 | 105 | 18,3    | 95     | 38                            | 37                          | 40                                | 41                              | 154                           | 150                         | 87                         | 84                       | 19                            | 19                          | 188             | 188           | 34  | 378  | 84      | 1            | 0                 | 3             | 2            | 5           | 1           | 8                                         | 0           | 5                |
| 14 | F       | 37  | 88      | 1,69    | 30,8 | 96  | 95  | 19,7    | 44     | 36                            | 35                          | 32                                | 29                              | 127                           | 127                         | 80                         | 69                       | 8                             | 8                           | 182             | 182           | 38  | 567  | 81      | 1            | 1                 | 2             | 2            | 3           | 2           | 5                                         | 6           | 0                |
| 15 | F       | 41  | 84      | 1,62    | 32,0 | 105 | 105 | 21,3    | 35     | 34                            | 34                          | 32                                | 32                              | 140                           | 150                         | 63                         | 60                       | 13                            | 13                          | 195             | 187           | 41  | 497  | 78      | 1            | 0                 | 3             | 1            | 4           | 1           | 10                                        | 2           | 7                |
| 16 | F       | 48  | 80      | 1,59    | 31,6 | 102 | 103 | 16,8    | 54     | 38                            | 36                          | 33                                | 31                              | 100                           | 110                         | 97                         | 86                       | 18                            | 19                          | 191             | 191           | 31  | 506  | 75      | 2            | 2                 | 3             | 2            | 5           | 1           | 5                                         | 3           | 5                |
| 17 | F       | 53  | 80      | 1,58    | 32,0 | 105 | 104 | 21,5    | 47     | 37                            | 35                          | 34                                | 29                              | 106                           | 105                         | 70                         | 70                       | 16                            | 15                          | 188             | 188           | 26  | 479  | 69      | 1            | 0                 | 2             | 1            | 2           | 3           | 5                                         | 2           | 0                |
| 18 | F       | 45  | 87      | 1,65    | 32,0 | 104 | 104 | 23,6    | 38     | 36                            | 35                          | 35                                | 37                              | 115                           | 120                         | 55                         | 66                       | 19                            | 17                          | 190             | 190           | 26  | 342  | 81      | 0            | 1                 | 3             | 2            | 3           | 1           | 6                                         | 2           | 3                |
| 19 | F       | 43  | 87      | 1,6     | 34,0 | 110 | 105 | 19,8    | 41     | 35                            | 34                          | 34                                | 34                              | 135                           | 159                         | 74                         | 70                       | 18                            | 18                          | 186             | 186           | 25  | 317  | 77      | 2            | 0                 | 3             | 2            | 5           | 1           | 15                                        | 2           | 7                |
| 20 | F       | 24  | 78      | 1,57    | 31,6 | 97  | 103 | 17,9    | 47     | 16                            | 16                          | 30                                | 32                              | 149                           | 155                         | 90                         | 80                       | 22                            | 19                          | 190             | 187           | 26  | 425  | 79      | 0            | 2                 | 2             | 2            | 4           | 2           | 5                                         | 5           | 0                |
| 21 | F       | 36  | 83      | 1,58    | 33,2 | 108 | 103 | 20,6    | 32     | 20                            | 20                          | 25                                | 25                              | 110                           | 110                         | 60                         | 65                       | 12                            | 8                           | 179             | 179           | 33  | 446  | 84      | 3            | 1                 | 3             | 2            | 4           | 1           | 14                                        | 3           | 7                |
| 22 | F       | 43  | 90      | 1,62    | 34,3 | 111 | 115 | 21,4    | 37     | 19                            | 19                          | 27                                | 25                              | 102                           | 100                         | 50                         | 60                       | 12                            | 12                          | 189             | 183           | 34  | 483  | 80      | 0            | 1                 | 2             | 2            | 3           | 2           | 5                                         | 4           | 4                |
| 23 | F       | 34  | 79      | 1,57    | 32,0 | 94  | 103 | 11      | 50     | 16                            | 16                          | 27                                | 23                              | 100                           | 100                         | 65                         | 72                       | 16                            | 16                          | 186             | 186           | 33  | 534  | 75      | 1            | 0                 | 3             | 2            | 3           | 2           | 18                                        | 1           | 7                |
| 24 | F       | 40  | 82      | 1,65    | 30,1 | 90  | 90  | 20,5    | 61     | 37                            | 35                          | 30                                | 32                              | 124                           | 147                         | 86                         | 80                       | 18                            | 18                          | 190             | 190           | 32  | 521  | 92      | 1            | 1                 | 2             | 1            | 2           | 1           | 5                                         | 3           | 5                |
| 25 | F       | 52  | 87      | 1,63    | 32,7 | 105 | 103 | 12,7    | 44     | 15                            | 15                          | 25                                | 23                              | 100                           | 100                         | 45                         | 50                       | 10                            | 8                           | 180             | 188           | 17  | 448  | 82      | 3            | 1                 | 1             | 2            | 5           | 0           | 6                                         | 2           | 0                |
| 26 | F       | 57  | 85      | 1,6     | 33,2 | 110 | 105 | 13,7    | 37     | 35                            | 34                          | 24                                | 21                              | 100                           | 110                         | 55                         | 66                       | 15                            | 11                          | 188             | 188           | 16  | 340  | 77      | 1            | 1                 | 2             | 1            | 4           | 1           | 3                                         | 2           | 0                |
| 27 | F       | 24  | 90      | 1,65    | 33,1 | 108 | 104 | 10,5    | 38     | 35                            | 34                          | 27                                | 23                              | 102                           | 100                         | 98                         | 85                       | 18                            | 19                          | 190             | 190           | 15  | 487  | 81      | 0            | 0                 | 3             | 2            | 3           | 1           | 2                                         | 4           | 0                |
| 28 | F       | 35  | 91      | 1,66    | 33,0 | 104 | 103 | 15,8    | 30     | 37                            | 35                          | 25                                | 22                              | 105                           | 110                         | 58                         | 65                       | 16                            | 16                          | 187             | 187           | 16  | 439  | 79      | 1            | 1                 | 3             | 2            | 5           | 1           | 10                                        | 3           | 7                |

**S1 Table. Data from the Intervention Group at T<sub>0</sub>.**
