# Supplementary material for: An exercise-based educational and motivational intervention after surgery can improve behaviors, physical fitness and quality of life in bariatric patients
Source: PubMed Central journal article supplement (PMC7595397; doi:10.1371/journal.pone.0241336), 2020-10-29
Supplement: pone.0241336.s002.pdf [file pone.0241336.s002.pdf]

| ID | GEN DER | AGE | WEIG HT | HEIG HT | BMI  | WC  | HC  | VO2 MAX | SQU AT | UPPE R LIMB STRE NGH T RIGH T | UPPE R LIMB STRE NGH T LEFT | SHO ULDE R ROM EXTE NSIO N RIGH T | SHO ULDE R ROM EXTE NSIO N LEFT | ELBO W ROM EXTE NSIO N RIGH T | ELBO W ROM EXTE NSIO N LEFT | ANKL E ROM FLEXI ON RIGH T | ANKL E ROM FLEXI ON LEFT | ANKL E ROM EXTE NSIO N RIGH T | ANKL E ROM EXTE NSIO N LEFT | KNEE ROM RIGH T | KNEE ROM LEFT | BES | IPAQ | ORW ELL | FRUI TS/D AY | VEGE TABL ES/D AY | CERE ALS/D AY | SWEE TS/D AY | MEA T/WE EK | FISH/ WE EK | MILK, YOG URT AND DAIR Y PRO DUCT S/WE EK | EGGS /WE EK | BREA KFAS T/WE EK |
|----|---------|-----|---------|---------|------|-----|-----|---------|--------|-------------------------------|-----------------------------|-----------------------------------|---------------------------------|-------------------------------|-----------------------------|----------------------------|--------------------------|-------------------------------|-----------------------------|-----------------|---------------|-----|------|---------|--------------|-------------------|---------------|--------------|-------------|-------------|-------------------------------------------|-------------|-------------------|
| 1  | F       | 28  | 117     | 1,63    | 44,0 | 112 | 115 | 25,6    | 25     | 25                            | 20                          | 39                                | 42                              | 145                           | 145                         | 115                        | 115                      | 18                            | 19                          | 176             | 178           | 15  | 654  | 54      | 2            | 2                 | 3             | 1            | 4           | 1           | 7                                         | 0           | 7                 |
| 2  | M       | 37  | 119     | 1,68    | 42,2 | 111 | 108 | 32,3    | 157    | 73                            | 59                          | 48                                | 50                              | 167                           | 177                         | 110                        | 110                      | 19                            | 19                          | 175             | 179           | 13  | 635  | 49      | 2            | 2                 | 3             | 0            | 4           | 1           | 5                                         | 1           | 7                 |
| 3  | F       | 42  | 75      | 1,57    | 30,4 | 108 | 107 | 35,7    | 76     | 29                            | 28                          | 37                                | 38                              | 146                           | 130                         | 102                        | 110                      | 18                            | 18                          | 174             | 180           | 14  | 619  | 59      | 1            | 2                 | 3             | 1            | 3           | 2           | 5                                         | 2           | 7                 |
| 4  | M       | 35  | 75      | 1,6     | 29,3 | 90  | 85  | 44,3    | 81     | 50                            | 48                          | 44                                | 48                              | 160                           | 160                         | 85                         | 85                       | 20                            | 20                          | 171             | 179           | 13  | 726  | 67      | 1            | 2                 | 3             | 0            | 4           | 1           | 7                                         | 4           | 7                 |
| 5  | M       | 29  | 91      | 1,72    | 30,8 | 100 | 94  | 45,0    | 146    | 73                            | 66                          | 48                                | 49                              | 162                           | 167                         | 115                        | 100                      | 18                            | 18                          | 174             | 180           | 14  | 626  | 63      | 3            | 2                 | 2             | 2            | 1           | 1           | 0                                         | 4           | 0                 |
| 6  | F       | 33  | 88      | 1,76    | 28,4 | 90  | 84  | 44,7    | 128    | 74                            | 63                          | 47                                | 50                              | 157                           | 157                         | 110                        | 110                      | 19                            | 20                          | 176             | 180           | 14  | 615  | 65      | 2            | 2                 | 3             | 0            | 6           | 1           | 13                                        | 3           | 7                 |
| 7  | F       | 34  | 69      | 1,58    | 27,6 | 98  | 94  | 44,5    | 88     | 51                            | 46                          | 44                                | 50                              | 143                           | 145                         | 83                         | 89                       | 18                            | 18                          | 171             | 178           | 26  | 624  | 59      | 1            | 2                 | 2             | 2            | 3           | 1           | 2                                         | 2           | 3                 |
| 8  | F       | 35  | 69      | 1,54    | 29,1 | 106 | 101 | 40,2    | 95     | 50                            | 49                          | 45                                | 48                              | 154                           | 164                         | 75                         | 75                       | 19                            | 19                          | 172             | 181           | 13  | 712  | 60      | 1            | 1                 | 3             | 1            | 4           | 2           | 3                                         | 3           | 7                 |
| 9  | F       | 32  | 76      | 1,61    | 29,3 | 86  | 81  | 44,7    | 104    | 67                            | 60                          | 49                                | 50                              | 158                           | 174                         | 78                         | 85                       | 19                            | 20                          | 171             | 181           | 16  | 612  | 63      | 1            | 2                 | 2             | 0            | 3           | 3           | 10                                        | 3           | 5                 |
| 10 | F       | 28  | 78      | 1,6     | 30,5 | 102 | 100 | 35,6    | 132    | 49                            | 49                          | 43                                | 49                              | 145                           | 130                         | 104                        | 102                      | 20                            | 20                          | 181             | 192           | 12  | 758  | 58      | 1            | 1                 | 3             | 0            | 4           | 1           | 5                                         | 2           | 7                 |
| 11 | F       | 53  | 69      | 1,58    | 27,6 | 90  | 85  | 45,3    | 102    | 42                            | 41                          | 44                                | 49                              | 141                           | 140                         | 78                         | 80                       | 22                            | 22                          | 170             | 180           | 12  | 713  | 63      | 1            | 2                 | 3             | 0            | 2           | 2           | 15                                        | 0           | 7                 |
| 12 | M       | 33  | 109     | 1,85    | 31,8 | 112 | 104 | 38,7    | 98     | 75                            | 66                          | 46                                | 49                              | 178                           | 185                         | 105                        | 100                      | 23                            | 23                          | 172             | 182           | 13  | 608  | 65      | 2            | 2                 | 2             | 0            | 3           | 3           | 14                                        | 1           | 7                 |
| 13 | F       | 39  | 70      | 1,56    | 28,8 | 98  | 95  | 38,5    | 153    | 60                            | 54                          | 50                                | 51                              | 175                           | 175                         | 111                        | 102                      | 21                            | 21                          | 175             | 185           | 8   | 602  | 71      | 1            | 2                 | 3             | 0            | 5           | 1           | 8                                         | 0           | 5                 |
| 14 | F       | 37  | 80      | 1,69    | 28,0 | 90  | 90  | 39,1    | 95     | 52                            | 49                          | 42                                | 43                              | 145                           | 145                         | 100                        | 100                      | 20                            | 20                          | 182             | 183           | 9   | 743  | 68      | 2            | 2                 | 2             | 2            | 3           | 2           | 5                                         | 4           | 0                 |
| 15 | F       | 41  | 78      | 1,62    | 29,7 | 100 | 97  | 32,1    | 93     | 44                            | 44                          | 42                                | 45                              | 174                           | 174                         | 89                         | 90                       | 20                            | 20                          | 169             | 180           | 11  | 610  | 63      | 1            | 1                 | 3             | 0            | 4           | 1           | 10                                        | 2           | 7                 |
| 16 | F       | 48  | 73      | 1,59    | 28,9 | 97  | 96  | 26,3    | 94     | 58                            | 54                          | 43                                | 41                              | 143                           | 146                         | 116                        | 112                      | 22                            | 22                          | 174             | 179           | 10  | 756  | 65      | 2            | 2                 | 3             | 0            | 5           | 1           | 5                                         | 3           | 7                 |
| 17 | F       | 53  | 73      | 1,58    | 29,2 | 100 | 97  | 39,4    | 88     | 57                            | 55                          | 44                                | 42                              | 143                           | 145                         | 86                         | 85                       | 20                            | 20                          | 172             | 180           | 14  | 611  | 59      | 1            | 2                 | 2             | 1            | 2           | 3           | 5                                         | 2           | 0                 |
| 18 | F       | 45  | 78      | 1,65    | 28,7 | 96  | 96  | 39,4    | 98     | 46                            | 45                          | 42                                | 47                              | 156                           | 156                         | 105                        | 106                      | 22                            | 23                          | 181             | 190           | 13  | 628  | 67      | 2            | 2                 | 3             | 0            | 3           | 1           | 6                                         | 2           | 7                 |
| 19 | F       | 43  | 76      | 1,6     | 29,7 | 100 | 97  | 32,4    | 84     | 45                            | 46                          | 44                                | 45                              | 158                           | 170                         | 98                         | 101                      | 20                            | 18                          | 176             | 179           | 12  | 612  | 67      | 2            | 1                 | 3             | 0            | 4           | 2           | 10                                        | 2           | 7                 |
| 20 | F       | 24  | 70      | 1,57    | 28,4 | 91  | 88  | 41,3    | 89     | 36                            | 30                          | 40                                | 45                              | 160                           | 160                         | 110                        | 110                      | 23                            | 21                          | 179             | 178           | 11  | 645  | 69      | 1            | 2                 | 2             | 2            | 4           | 2           | 5                                         | 4           | 0                 |
| 21 | F       | 36  | 71      | 1,58    | 28,4 | 98  | 94  | 41,8    | 87     | 39                            | 34                          | 35                                | 40                              | 142                           | 142                         | 115                        | 100                      | 22                            | 22                          | 174             | 179           | 10  | 638  | 55      | 2            | 2                 | 3             | 0            | 4           | 1           | 14                                        | 3           | 7                 |
| 22 | F       | 43  | 76      | 1,62    | 29,0 | 101 | 95  | 37,1    | 85     | 33                            | 30                          | 37                                | 40                              | 159                           | 159                         | 80                         | 80                       | 19                            | 17                          | 168             | 174           | 16  | 633  | 61      | 2            | 2                 | 2             | 1            | 3           | 2           | 5                                         | 4           | 7                 |
| 23 | F       | 34  | 70      | 1,57    | 28,4 | 87  | 83  | 40,2    | 90     | 23                            | 20                          | 36                                | 39                              | 157                           | 157                         | 77                         | 77                       | 18                            | 16                          | 176             | 180           | 17  | 684  | 59      | 1            | 2                 | 3             | 0            | 3           | 2           | 9                                         | 1           | 7                 |
| 24 | F       | 40  | 80      | 1,65    | 29,4 | 88  | 84  | 40,3    | 123    | 58                            | 56                          | 39                                | 42                              | 159                           | 179                         | 112                        | 100                      | 20                            | 23                          | 180             | 184           | 9   | 748  | 67      | 1            | 1                 | 2             | 1            | 3           | 1           | 5                                         | 3           | 7                 |
| 25 | F       | 52  | 78      | 1,63    | 29,4 | 100 | 98  | 30,7    | 97     | 23                            | 20                          | 38                                | 37                              | 140                           | 120                         | 79                         | 80                       | 20                            | 20                          | 170             | 179           | 12  | 598  | 69      | 3            | 2                 | 1             | 2            | 4           | 0           | 6                                         | 2           | 0                 |
| 26 | F       | 57  | 75      | 1,6     | 29,3 | 105 | 99  | 35,7    | 87     | 48                            | 47                          | 36                                | 38                              | 145                           | 140                         | 89                         | 90                       | 19                            | 21                          | 169             | 178           | 13  | 613  | 63      | 2            | 1                 | 2             | 2            | 4           | 1           | 7                                         | 2           | 7                 |
| 27 | F       | 24  | 78      | 1,65    | 28,7 | 97  | 95  | 40      | 89     | 50                            | 49                          | 37                                | 41                              | 148                           | 145                         | 116                        | 115                      | 18                            | 17                          | 171             | 179           | 15  | 621  | 65      | 2            | 2                 | 2             | 1            | 3           | 1           | 2                                         | 4           | 0                 |
| 28 | F       | 35  | 80      | 1,66    | 29,0 | 96  | 91  | 38,4    | 83     | 53                            | 50                          | 38                                | 39                              | 147                           | 147                         | 80                         | 83                       | 20                            | 20                          | 170             | 175           | 16  | 625  | 58      | 1            | 2                 | 3             | 1            | 5           | 1           | 10                                        | 3           | 7                 |

**S2 Table. Data from the Intervention Group at T<sub>1</sub>.**
