# Supplementary material for: An exercise-based educational and motivational intervention after surgery can improve behaviors, physical fitness and quality of life in bariatric patients
Source: PubMed Central journal article supplement (PMC7595397; doi:10.1371/journal.pone.0241336), 2020-10-29
Supplement: pone.0241336.s003.pdf [file pone.0241336.s003.pdf]

| ID | GEN DER | AGE | WEIG HT | HEIG HT | BMI  | WC  | HC  | VO2 MAX | SQU AT | UPPE R LIMB STRE NGH T RIGH T | UPPE R LIMB STRE NGH T LEFT | SHO ULDE R ROM EXTE NSIO N RIGH T | SHO ULDE R ROM EXTE NSIO N LEFT | ELBO W ROM EXTE NSIO N RIGH T | ELBO W ROM EXTE NSIO N LEFT | ANKL E ROM FLEXI ON RIGH T | ANKL E ROM FLEXI ON LEFT | ANKL E ROM EXTE NSIO N RIGH T | ANKL E ROM EXTE NSIO N LEFT | KNEE ROM RIGH T | KNEE ROM LEFT | BES | IPAQ | ORW ELL | FRUI TS/D AY | VEGE TABL ES/D AY | CERE ALS/D AY | SWEE TS/D AY | MEA T/WE EK | FISH/ WEE K | MILK, YOG URT AND DAIR Y PRO DUCT S/WE EK | EGGS /WEE K | BREA KFAS T/WE EK |
|----|---------|-----|---------|---------|------|-----|-----|---------|--------|-------------------------------|-----------------------------|-----------------------------------|---------------------------------|-------------------------------|-----------------------------|----------------------------|--------------------------|-------------------------------|-----------------------------|-----------------|---------------|-----|------|---------|--------------|-------------------|---------------|--------------|-------------|-------------|-------------------------------------------|-------------|-------------------|
| 1  | F       | 60  | 97      | 1,60    | 37,9 | 121 | 121 | 9,4     | 43     | 15                            | 15                          | 22                                | 23                              | 121                           | 121                         | 73                         | 73                       | 12                            | 13                          | 192             | 190           | 35  | 545  | 78      | 0            | 1                 | 1             | 2            | 4           | 0           | 2                                         | 2           | 2                 |
| 2  | F       | 39  | 79      | 1,50    | 35,1 | 110 | 111 | 41,2    | 76     | 19                            | 18                          | 24                                | 23                              | 93                            | 93                          | 68                         | 57                       | 10                            | 10                          | 191             | 190           | 30  | 490  | 81      | 2            | 1                 | 2             | 2            | 3           | 1           | 2                                         | 2           | 0                 |
| 3  | F       | 49  | 109     | 1,65    | 40,0 | 118 | 116 | 41,0    | 30     | 19                            | 18                          | 26                                | 27                              | 111                           | 111                         | 82                         | 71                       | 13                            | 14                          | 185             | 185           | 34  | 544  | 76      | 1            | 1                 | 2             | 2            | 3           | 1           | 4                                         | 2           | 2                 |
| 4  | M       | 45  | 118     | 1,70    | 40,8 | 123 | 120 | 10,4    | 38     | 49                            | 47                          | 42                                | 36                              | 161                           | 165                         | 91                         | 90                       | 20                            | 16                          | 186             | 186           | 33  | 511  | 88      | 0            | 2                 | 2             | 2            | 5           | 2           | 7                                         | 2           | 4                 |
| 5  | F       | 27  | 125     | 1,76    | 40,4 | 117 | 115 | 12,7    | 31     | 29                            | 28                          | 26                                | 31                              | 129                           | 134                         | 93                         | 80                       | 14                            | 14                          | 187             | 184           | 29  | 528  | 87      | 3            | 1                 | 1             | 2            | 2           | 1           | 1                                         | 3           | 1                 |
| 6  | M       | 44  | 106     | 1,76    | 34,2 | 100 | 95  | 22,4    | 39     | 48                            | 46                          | 41                                | 37                              | 155                           | 164                         | 90                         | 85                       | 16                            | 13                          | 180             | 182           | 28  | 540  | 75      | 0            | 0                 | 2             | 1            | 3           | 2           | 15                                        | 3           | 6                 |
| 7  | M       | 46  | 102     | 1,77    | 32,6 | 95  | 91  | 11,5    | 47     | 50                            | 47                          | 46                                | 41                              | 133                           | 137                         | 73                         | 60                       | 11                            | 13                          | 187             | 185           | 25  | 489  | 67      | 0            | 2                 | 3             | 2            | 5           | 3           | 3                                         | 2           | 3                 |
| 8  | F       | 45  | 105     | 1,62    | 40,0 | 122 | 110 | 12,5    | 32     | 35                            | 35                          | 38                                | 36                              | 152                           | 160                         | 91                         | 91                       | 16                            | 15                          | 186             | 180           | 32  | 548  | 79      | 0            | 2                 | 3             | 2            | 6           | 0           | 7                                         | 3           | 4                 |
| 9  | F       | 47  | 78      | 1,55    | 32,5 | 104 | 100 | 22,0    | 52     | 15                            | 15                          | 25                                | 30                              | 147                           | 147                         | 87                         | 85                       | 10                            | 13                          | 184             | 183           | 33  | 557  | 70      | 1            | 1                 | 3             | 1            | 3           | 2           | 14                                        | 2           | 7                 |
| 10 | F       | 37  | 82      | 1,54    | 34,6 | 112 | 103 | 14,6    | 34     | 22                            | 22                          | 20                                | 21                              | 127                           | 132                         | 95                         | 88                       | 13                            | 13                          | 192             | 190           | 31  | 551  | 76      | 0            | 1                 | 1             | 1            | 2           | 1           | 3                                         | 4           | 2                 |
| 11 | M       | 49  | 115     | 1,81    | 35,1 | 107 | 98  | 24,7    | 44     | 46                            | 44                          | 41                                | 40                              | 92                            | 92                          | 65                         | 61                       | 10                            | 12                          | 184             | 184           | 24  | 558  | 83      | 0            | 2                 | 3             | 1            | 2           | 1           | 10                                        | 2           | 5                 |
| 12 | M       | 24  | 78      | 1,61    | 30,1 | 95  | 98  | 40,7    | 91     | 51                            | 47                          | 43                                | 39                              | 171                           | 184                         | 78                         | 65                       | 12                            | 20                          | 181             | 183           | 30  | 540  | 75      | 0            | 1                 | 1             | 3            | 3           | 3           | 7                                         | 2           | 5                 |
| 13 | M       | 43  | 102     | 1,77    | 32,6 | 98  | 100 | 21,6    | 42     | 49                            | 46                          | 40                                | 37                              | 134                           | 134                         | 96                         | 80                       | 17                            | 16                          | 187             | 187           | 26  | 579  | 81      | 1            | 0                 | 1             | 2            | 4           | 1           | 10                                        | 3           | 7                 |
| 14 | F       | 56  | 92      | 1,63    | 34,6 | 112 | 100 | 11,0    | 36     | 25                            | 25                          | 28                                | 38                              | 142                           | 145                         | 83                         | 69                       | 16                            | 17                          | 184             | 183           | 32  | 535  | 69      | 1            | 1                 | 3             | 2            | 3           | 3           | 12                                        | 5           | 7                 |
| 15 | M       | 35  | 97      | 1,78    | 30,6 | 98  | 100 | 39,0    | 98     | 48                            | 48                          | 41                                | 37                              | 119                           | 119                         | 90                         | 83                       | 13                            | 13                          | 185             | 186           | 23  | 558  | 85      | 0            | 1                 | 2             | 2            | 5           | 1           | 10                                        | 2           | 7                 |
| 16 | F       | 38  | 87      | 1,59    | 34,4 | 109 | 110 | 9,7     | 39     | 26                            | 26                          | 27                                | 28                              | 95                            | 95                          | 64                         | 60                       | 14                            | 15                          | 190             | 190           | 35  | 212  | 81      | 0            | 1                 | 3             | 2            | 2           | 1           | 8                                         | 3           | 5                 |
| 17 | F       | 45  | 81      | 1,60    | 31,6 | 100 | 101 | 10,0    | 38     | 28                            | 28                          | 32                                | 34                              | 127                           | 137                         | 67                         | 65                       | 15                            | 16                          | 184             | 187           | 34  | 388  | 76      | 1            | 0                 | 3             | 1            | 3           | 1           | 0                                         | 2           | 0                 |
| 18 | F       | 30  | 90      | 1,60    | 35,2 | 116 | 111 | 10,2    | 43     | 30                            | 30                          | 28                                | 29                              | 98                            | 98                          | 65                         | 60                       | 13                            | 13                          | 187             | 187           | 25  | 312  | 82      | 0            | 1                 | 4             | 1            | 3           | 1           | 15                                        | 3           | 7                 |
| 19 | F       | 39  | 70      | 1,50    | 31,1 | 102 | 103 | 38,7    | 66     | 20                            | 20                          | 26                                | 29                              | 106                           | 110                         | 80                         | 75                       | 15                            | 14                          | 188             | 188           | 36  | 356  | 91      | 1            | 1                 | 3             | 1            | 5           | 1           | 8                                         | 2           | 4                 |
| 20 | F       | 39  | 85      | 1,65    | 31,2 | 101 | 100 | 10,3    | 34     | 27                            | 27                          | 30                                | 32                              | 111                           | 114                         | 73                         | 70                       | 12                            | 15                          | 187             | 187           | 26  | 546  | 84      | 1            | 2                 | 3             | 2            | 5           | 1           | 3                                         | 2           | 3                 |
| 21 | F       | 48  | 87      | 1,60    | 34,0 | 103 | 102 | 11,6    | 37     | 33                            | 32                          | 35                                | 34                              | 146                           | 150                         | 70                         | 65                       | 15                            | 17                          | 185             | 186           | 33  | 356  | 81      | 1            | 2                 | 2             | 3            | 4           | 1           | 10                                        | 2           | 5                 |
| 22 | F       | 27  | 93      | 1,66    | 33,7 | 113 | 115 | 11,4    | 51     | 31                            | 30                          | 27                                | 29                              | 94                            | 94                          | 82                         | 70                       | 13                            | 14                          | 187             | 188           | 25  | 459  | 84      | 0            | 1                 | 2             | 2            | 3           | 1           | 5                                         | 3           | 3                 |
| 23 | F       | 32  | 84      | 1,60    | 32,8 | 98  | 99  | 23,7    | 39     | 34                            | 32                          | 33                                | 37                              | 140                           | 165                         | 85                         | 63                       | 12                            | 12                          | 186             | 191           | 25  | 367  | 87      | 0            | 0                 | 2             | 1            | 3           | 2           | 9                                         | 4           | 4                 |
| 24 | F       | 26  | 90      | 1,63    | 33,9 | 108 | 107 | 10,3    | 36     | 34                            | 32                          | 39                                | 40                              | 123                           | 126                         | 75                         | 63                       | 11                            | 11                          | 187             | 190           | 31  | 514  | 85      | 3            | 1                 | 3             | 2            | 3           | 2           | 7                                         | 2           | 5                 |
| 25 | M       | 45  | 93      | 1,70    | 32,2 | 98  | 98  | 10,1    | 55     | 39                            | 39                          | 37                                | 37                              | 121                           | 121                         | 90                         | 76                       | 16                            | 16                          | 191             | 193           | 35  | 487  | 81      | 2            | 2                 | 2             | 1            | 5           | 0           | 3                                         | 2           | 0                 |
| 26 | F       | 37  | 85      | 1,55    | 35,4 | 108 | 105 | 23,3    | 52     | 29                            | 28                          | 30                                | 32                              | 153                           | 156                         | 85                         | 84                       | 17                            | 15                          | 188             | 188           | 38  | 512  | 79      | 1            | 1                 | 1             | 1            | 4           | 1           | 3                                         | 2           | 3                 |
| 27 | M       | 37  | 92      | 1,68    | 32,6 | 98  | 101 | 21,6    | 78     | 49                            | 48                          | 40                                | 36                              | 125                           | 130                         | 91                         | 91                       | 18                            | 18                          | 186             | 189           | 34  | 523  | 80      | 0            | 1                 | 1             | 3            | 3           | 2           | 2                                         | 1           | 0                 |
| 28 | F       | 49  | 93      | 1,61    | 35,9 | 115 | 110 | 11,5    | 44     | 16                            | 15                          | 25                                | 28                              | 112                           | 115                         | 88                         | 80                       | 15                            | 15                          | 188             | 188           | 33  | 458  | 82      | 1            | 1                 | 2             | 2            | 5           | 4           | 13                                        | 2           | 5                 |
| 29 | M       | 23  | 97      | 1,81    | 29,6 | 98  | 97  | 25,6    | 92     | 55                            | 52                          | 46                                | 39                              | 145                           | 169                         | 87                         | 90                       | 16                            | 20                          | 189             | 188           | 35  | 378  | 90      | 0            | 0                 | 2             | 3            | 4           | 3           | 12                                        | 3           | 5                 |
| 30 | F       | 43  | 92      | 1,65    | 33,8 | 102 | 103 | 10,3    | 42     | 19                            | 19                          | 25                                | 29                              | 97                            | 95                          | 63                         | 60                       | 10                            | 11                          | 186             | 187           | 31  | 567  | 86      | 0            | 0                 | 1             | 2            | 3           | 2           | 6                                         | 2           | 3                 |
| 31 | F       | 52  | 92      | 1,63    | 34,6 | 108 | 105 | 11,3    | 36     | 16                            | 16                          | 25                                | 31                              | 115                           | 120                         | 65                         | 65                       | 13                            | 15                          | 185             | 180           | 33  | 497  | 78      | 1            | 2                 | 1             | 3            | 5           | 1           | 2                                         | 3           | 0                 |
| 32 | F       | 35  | 81      | 1,65    | 29,8 | 98  | 100 | 22,6    | 37     | 35                            | 35                          | 34                                | 37                              | 119                           | 122                         | 91                         | 91                       | 20                            | 16                          | 187             | 185           | 30  | 506  | 75      | 1            | 1                 | 2             | 2            | 3           | 1           | 9                                         | 1           | 3                 |
| 33 | F       | 38  | 87      | 1,59    | 34,4 | 103 | 104 | 10,8    | 61     | 15                            | 15                          | 21                                | 23                              | 96                            | 94                          | 64                         | 61                       | 13                            | 15                          | 186             | 187           | 35  | 479  | 69      | 1            | 0                 | 2             | 2            | 5           | 0           | 11                                        | 2           | 7                 |
| 34 | F       | 48  | 85      | 1,60    | 33,2 | 98  | 100 | 9,0     | 38     | 35                            | 34                          | 41                                | 39                              | 127                           | 132                         | 93                         | 85                       | 17                            | 17                          | 190             | 191           | 29  | 342  | 81      | 0            | 2                 | 1             | 2            | 4           | 2           | 3                                         | 2           | 1                 |
| 35 | F       | 59  | 89      | 1,63    | 33,5 | 105 | 102 | 18,9    | 34     | 35                            | 32                          | 32                                | 32                              | 121                           | 120                         | 83                         | 75                       | 15                            | 15                          | 189             | 186           | 25  | 237  | 78      | 0            | 1                 | 2             | 1            | 3           | 2           | 15                                        | 3           | 7                 |
| 36 | F       | 39  | 81      | 1,58    | 32,4 | 96  | 97  | 24,0    | 44     | 21                            | 21                          | 24                                | 27                              | 91                            | 89                          | 64                         | 58                       | 14                            | 14                          | 187             | 187           | 26  | 438  | 79      | 1            | 0                 | 3             | 2            | 5           | 2           | 5                                         | 3           | 5                 |
| 37 | M       | 34  | 92      | 1,75    | 30,0 | 94  | 91  | 22,4    | 87     | 53                            | 50                          | 42                                | 37                              | 148                           | 155                         | 78                         | 70                       | 15                            | 15                          | 188             | 187           | 30  | 484  | 84      | 1            | 1                 | 3             | 2            | 3           | 1           | 7                                         | 4           | 3                 |
| 38 | F       | 46  | 90      | 1,68    | 31,9 | 97  | 98  | 26,7    | 42     | 26                            | 25                          | 28                                | 30                              | 134                           | 137                         | 80                         | 65                       | 10                            | 14                          | 186             | 183           | 29  | 534  | 80      | 1            | 1                 | 2             | 1            | 4           | 0           | 10                                        | 2           | 5                 |
| 39 | M       | 27  | 100     | 1,75    | 32,7 | 98  | 96  | 26,3    | 90     | 50                            | 48                          | 44                                | 33                              | 123                           | 127                         | 90                         | 78                       | 14                            | 15                          | 188             | 188           | 16  | 567  | 75      | 2            | 1                 | 3             | 2            | 5           | 2           | 3                                         | 3           | 0                 |
| 40 | F       | 47  | 90      | 1,64    | 33,5 | 105 | 103 | 9,2     | 35     | 34                            | 33                          | 26                                | 33                              | 92                            | 90                          | 93                         | 75                       | 11                            | 11                          | 189             | 185           | 32  | 634  | 89      | 1            | 1                 | 2             | 2            | 3           | 1           | 3                                         | 3           | 1                 |
| 41 | F       | 35  | 92      | 1,68    | 32,6 | 97  | 95  | 27,5    | 47     | 38                            | 35                          | 39                                | 35                              | 95                            | 90                          | 65                         | 57                       | 10                            | 13                          | 187             | 187           | 30  | 524  | 83      | 0            | 1                 | 1             | 2            | 2           | 2           | 3                                         | 3           | 0                 |
| 42 | F       | 23  | 86      | 1,61    | 33,2 | 100 | 101 | 10,9    | 38     | 37                            | 34                          | 31                                | 33                              | 97                            | 93                          | 67                         | 58                       | 9                             | 11                          | 189             | 189           | 17  | 482  | 75      | 1            | 0                 | 3             | 1            | 3           | 3           | 12                                        | 3           | 5                 |

**S3 Table. Data from the Control Group at T<sub>0</sub>.**
