# Supplementary material for: An exercise-based educational and motivational intervention after surgery can improve behaviors, physical fitness and quality of life in bariatric patients
Source: PubMed Central journal article supplement (PMC7595397; doi:10.1371/journal.pone.0241336), 2020-10-29
Supplement: pone.0241336.s004.pdf [file pone.0241336.s004.pdf]

| ID | GEN DER | AGE | WEIG HT | HEIG HT | BMI  | WC  | HC  | VO2 MAX | SQU AT | UPPE R LIMB STRE NGH T RIGH T | UPPE R LIMB STRE NGH T LEFT | SHO ULDE R ROM EXTE NSIO N RIGH T | SHO ULDE R ROM EXTE NSIO N LEFT | ELBO W ROM EXTE NSIO N RIGH T | ELBO W ROM EXTE NSIO N LEFT | ANKL E ROM FLEXI ON RIGH T | ANKL E ROM FLEXI ON LEFT | ANKL E ROM EXTE NSIO N RIGH T | ANKL E ROM EXTE NSIO N LEFT | KNEE ROM RIGH T | KNEE ROM LEFT | BES | IPAQ | ORW ELL | FRUI TS/D AY | VEGE TABL ES/D AY | CERE ALS/D AY | SWEE TS/D AY | MEA T/WE EK | FISH/ WEE K | MILK, YOG URT AND DAIR Y PRO DUCT S/WE EK | EGGS /WEE K | BREA KFAS T/WE EK |
|----|---------|-----|---------|---------|------|-----|-----|---------|--------|-------------------------------|-----------------------------|-----------------------------------|---------------------------------|-------------------------------|-----------------------------|----------------------------|--------------------------|-------------------------------|-----------------------------|-----------------|---------------|-----|------|---------|--------------|-------------------|---------------|--------------|-------------|-------------|-------------------------------------------|-------------|-------------------|
| 1  | F       | 60  | 98      | 1,60    | 38,3 | 117 | 120 | 14,5    | 44     | 18                            | 15                          | 24                                | 23                              | 121                           | 121                         | 73                         | 73                       | 12                            | 13                          | 190             | 190           | 30  | 545  | 79      | 0            | 1                 | 1             | 2            | 4           | 0           | 2                                         | 2           | 2                 |
| 2  | F       | 39  | 75      | 1,50    | 33,3 | 107 | 107 | 40,5    | 71     | 20                            | 19                          | 25                                | 23                              | 109                           | 105                         | 68                         | 57                       | 10                            | 10                          | 179             | 190           | 21  | 490  | 80      | 2            | 2                 | 2             | 2            | 3           | 1           | 2                                         | 2           | 0                 |
| 3  | F       | 49  | 110     | 1,65    | 40,4 | 118 | 116 | 41,5    | 42     | 20                            | 18                          | 27                                | 26                              | 111                           | 111                         | 82                         | 71                       | 13                            | 14                          | 192             | 185           | 31  | 544  | 76      | 1            | 1                 | 2             | 2            | 3           | 1           | 4                                         | 2           | 2                 |
| 4  | M       | 45  | 115     | 1,70    | 39,8 | 110 | 118 | 13,7    | 39     | 49                            | 48                          | 42                                | 42                              | 154                           | 165                         | 91                         | 90                       | 20                            | 22                          | 186             | 186           | 33  | 511  | 75      | 0            | 2                 | 2             | 2            | 5           | 2           | 7                                         | 2           | 4                 |
| 5  | F       | 27  | 135     | 1,76    | 43,6 | 117 | 118 | 15,8    | 35     | 30                            | 28                          | 27                                | 25                              | 130                           | 134                         | 91                         | 80                       | 14                            | 14                          | 191             | 184           | 18  | 528  | 87      | 3            | 1                 | 2             | 2            | 2           | 1           | 1                                         | 3           | 1                 |
| 6  | M       | 44  | 103     | 1,76    | 33,3 | 98  | 96  | 23,0    | 40     | 49                            | 46                          | 42                                | 42                              | 155                           | 164                         | 100                        | 100                      | 20                            | 22                          | 180             | 182           | 19  | 540  | 76      | 0            | 0                 | 2             | 1            | 3           | 2           | 12                                        | 3           | 6                 |
| 7  | M       | 46  | 96      | 1,77    | 30,6 | 95  | 93  | 18,9    | 48     | 51                            | 48                          | 47                                | 46                              | 133                           | 137                         | 73                         | 60                       | 11                            | 13                          | 190             | 185           | 18  | 489  | 67      | 0            | 2                 | 3             | 2            | 5           | 3           | 3                                         | 2           | 3                 |
| 8  | F       | 45  | 115     | 1,62    | 43,8 | 121 | 114 | 11,9    | 33     | 37                            | 35                          | 39                                | 38                              | 152                           | 160                         | 96                         | 91                       | 18                            | 20                          | 179             | 180           | 21  | 548  | 80      | 0            | 2                 | 3             | 2            | 5           | 0           | 7                                         | 3           | 4                 |
| 9  | F       | 47  | 80      | 1,55    | 33,3 | 107 | 103 | 23,4    | 53     | 17                            | 15                          | 26                                | 26                              | 147                           | 147                         | 87                         | 85                       | 10                            | 13                          | 184             | 183           | 18  | 557  | 70      | 1            | 2                 | 3             | 1            | 3           | 2           | 14                                        | 2           | 7                 |
| 10 | F       | 37  | 80      | 1,54    | 33,7 | 110 | 100 | 15,2    | 35     | 23                            | 22                          | 21                                | 21                              | 127                           | 132                         | 105                        | 100                      | 13                            | 15                          | 185             | 190           | 19  | 551  | 75      | 0            | 1                 | 2             | 1            | 2           | 1           | 3                                         | 4           | 2                 |
| 11 | M       | 49  | 88      | 1,81    | 26,9 | 100 | 96  | 38,4    | 45     | 47                            | 44                          | 42                                | 41                              | 165                           | 140                         | 88                         | 61                       | 10                            | 12                          | 181             | 184           | 9   | 635  | 85      | 0            | 2                 | 3             | 1            | 2           | 1           | 10                                        | 2           | 5                 |
| 12 | M       | 24  | 70      | 1,61    | 27,0 | 94  | 98  | 40,1    | 80     | 52                            | 48                          | 45                                | 45                              | 187                           | 184                         | 78                         | 65                       | 12                            | 15                          | 179             | 183           | 18  | 540  | 70      | 0            | 1                 | 1             | 0            | 3           | 3           | 7                                         | 2           | 5                 |
| 13 | M       | 43  | 100     | 1,77    | 31,9 | 98  | 99  | 22,7    | 43     | 49                            | 46                          | 41                                | 41                              | 134                           | 134                         | 96                         | 80                       | 17                            | 18                          | 181             | 187           | 20  | 764  | 81      | 1            | 0                 | 1             | 2            | 4           | 1           | 10                                        | 3           | 7                 |
| 14 | F       | 56  | 87      | 1,63    | 32,7 | 103 | 99  | 12,7    | 37     | 27                            | 26                          | 30                                | 30                              | 142                           | 140                         | 83                         | 69                       | 16                            | 17                          | 184             | 183           | 22  | 535  | 69      | 1            | 1                 | 3             | 2            | 3           | 3           | 10                                        | 5           | 7                 |
| 15 | M       | 35  | 65      | 1,78    | 20,5 | 94  | 89  | 43,8    | 80     | 49                            | 48                          | 42                                | 42                              | 129                           | 125                         | 90                         | 83                       | 13                            | 13                          | 179             | 186           | 6   | 754  | 85      | 0            | 1                 | 2             | 2            | 5           | 1           | 10                                        | 2           | 7                 |
| 16 | F       | 38  | 86      | 1,59    | 34,0 | 102 | 110 | 13,2    | 40     | 27                            | 26                          | 28                                | 27                              | 95                            | 95                          | 64                         | 60                       | 14                            | 15                          | 187             | 190           | 30  | 356  | 81      | 0            | 1                 | 3             | 2            | 2           | 1           | 8                                         | 3           | 5                 |
| 17 | F       | 45  | 87      | 1,60    | 34,0 | 98  | 104 | 13,8    | 39     | 29                            | 28                          | 33                                | 33                              | 127                           | 127                         | 67                         | 65                       | 15                            | 16                          | 184             | 185           | 33  | 489  | 83      | 1            | 0                 | 3             | 1            | 3           | 1           | 0                                         | 2           | 0                 |
| 18 | F       | 30  | 95      | 1,60    | 37,1 | 115 | 113 | 11,8    | 44     | 31                            | 30                          | 28                                | 27                              | 98                            | 98                          | 70                         | 60                       | 13                            | 13                          | 187             | 187           | 20  | 409  | 86      | 0            | 1                 | 3             | 1            | 3           | 1           | 15                                        | 2           | 7                 |
| 19 | F       | 39  | 70      | 1,50    | 31,1 | 100 | 104 | 35,6    | 67     | 21                            | 19                          | 27                                | 27                              | 129                           | 129                         | 99                         | 88                       | 15                            | 16                          | 191             | 188           | 31  | 356  | 90      | 1            | 1                 | 3             | 1            | 4           | 1           | 8                                         | 2           | 4                 |
| 20 | F       | 39  | 60      | 1,65    | 22,0 | 93  | 96  | 18,9    | 42     | 28                            | 27                          | 33                                | 31                              | 134                           | 140                         | 73                         | 65                       | 12                            | 15                          | 188             | 187           | 21  | 546  | 84      | 1            | 2                 | 3             | 2            | 3           | 3           | 1                                         | 2           | 3                 |
| 21 | F       | 48  | 86      | 1,60    | 33,6 | 101 | 101 | 13,4    | 38     | 34                            | 33                          | 36                                | 35                              | 146                           | 159                         | 76                         | 63                       | 15                            | 17                          | 191             | 186           | 19  | 356  | 81      | 1            | 2                 | 2             | 1            | 4           | 1           | 10                                        | 2           | 5                 |
| 22 | F       | 27  | 91      | 1,66    | 33,0 | 99  | 106 | 15,4    | 52     | 33                            | 30                          | 28                                | 28                              | 100                           | 90                          | 90                         | 84                       | 13                            | 14                          | 183             | 181           | 9   | 459  | 85      | 1            | 1                 | 2             | 2            | 3           | 1           | 5                                         | 3           | 3                 |
| 23 | F       | 32  | 85      | 1,60    | 33,2 | 100 | 102 | 25,9    | 40     | 35                            | 32                          | 35                                | 37                              | 140                           | 140                         | 85                         | 80                       | 12                            | 12                          | 180             | 180           | 18  | 367  | 85      | 1            | 1                 | 2             | 1            | 3           | 2           | 9                                         | 4           | 4                 |
| 24 | F       | 26  | 60      | 1,63    | 22,6 | 97  | 98  | 32,8    | 35     | 36                            | 33                          | 41                                | 41                              | 149                           | 160                         | 75                         | 78                       | 11                            | 11                          | 193             | 190           | 20  | 514  | 81      | 3            | 1                 | 3             | 2            | 3           | 2           | 7                                         | 2           | 5                 |
| 25 | M       | 45  | 92      | 1,70    | 31,8 | 95  | 98  | 15,4    | 38     | 40                            | 39                          | 38                                | 37                              | 121                           | 121                         | 96                         | 93                       | 16                            | 20                          | 185             | 180           | 32  | 487  | 81      | 2            | 2                 | 2             | 1            | 5           | 0           | 3                                         | 2           | 0                 |
| 26 | F       | 37  | 70      | 1,55    | 29,1 | 100 | 99  | 30,2    | 50     | 30                            | 29                          | 31                                | 32                              | 158                           | 163                         | 90                         | 84                       | 17                            | 21                          | 188             | 188           | 30  | 512  | 68      | 1            | 1                 | 1             | 1            | 4           | 1           | 3                                         | 2           | 3                 |
| 27 | M       | 37  | 90      | 1,68    | 31,9 | 97  | 99  | 13,4    | 69     | 49                            | 48                          | 42                                | 41                              | 145                           | 147                         | 96                         | 91                       | 18                            | 18                          | 192             | 189           | 18  | 523  | 80      | 0            | 1                 | 1             | 0            | 3           | 2           | 2                                         | 1           | 0                 |
| 28 | F       | 49  | 91      | 1,61    | 35,1 | 115 | 107 | 12,2    | 45     | 20                            | 16                          | 26                                | 24                              | 126                           | 126                         | 90                         | 92                       | 15                            | 17                          | 181             | 188           | 19  | 458  | 82      | 1            | 1                 | 2             | 2            | 5           | 4           | 13                                        | 2           | 5                 |
| 29 | M       | 23  | 90      | 1,81    | 27,5 | 95  | 98  | 33,7    | 81     | 54                            | 52                          | 46                                | 45                              | 156                           | 156                         | 87                         | 84                       | 16                            | 20                          | 190             | 188           | 19  | 405  | 90      | 0            | 0                 | 2             | 1            | 4           | 3           | 12                                        | 3           | 5                 |
| 30 | F       | 43  | 93      | 1,65    | 34,2 | 108 | 105 | 15,7    | 40     | 20                            | 19                          | 26                                | 27                              | 102                           | 90                          | 77                         | 73                       | 10                            | 10                          | 183             | 187           | 20  | 567  | 86      | 0            | 0                 | 2             | 2            | 3           | 2           | 6                                         | 2           | 3                 |
| 31 | F       | 52  | 89      | 1,63    | 33,5 | 107 | 104 | 19,8    | 45     | 19                            | 16                          | 25                                | 24                              | 120                           | 120                         | 75                         | 70                       | 13                            | 15                          | 192             | 180           | 33  | 497  | 78      | 1            | 2                 | 2             | 3            | 5           | 1           | 2                                         | 3           | 0                 |
| 32 | F       | 35  | 90      | 1,65    | 33,1 | 103 | 104 | 23,0    | 38     | 36                            | 35                          | 35                                | 35                              | 121                           | 120                         | 95                         | 91                       | 20                            | 23                          | 193             | 185           | 20  | 506  | 79      | 1            | 1                 | 2             | 2            | 3           | 1           | 9                                         | 2           | 3                 |
| 33 | F       | 38  | 86      | 1,59    | 34,0 | 103 | 103 | 15,1    | 62     | 16                            | 15                          | 22                                | 21                              | 108                           | 98                          | 66                         | 61                       | 13                            | 15                          | 180             | 180           | 30  | 479  | 76      | 1            | 0                 | 2             | 2            | 5           | 0           | 11                                        | 2           | 7                 |
| 34 | F       | 48  | 82      | 1,60    | 32,0 | 95  | 101 | 11,5    | 39     | 36                            | 34                          | 41                                | 41                              | 127                           | 132                         | 93                         | 84                       | 17                            | 17                          | 180             | 180           | 19  | 342  | 81      | 0            | 2                 | 1             | 2            | 4           | 2           | 3                                         | 2           | 1                 |
| 35 | F       | 59  | 88      | 1,63    | 33,1 | 105 | 102 | 19,4    | 35     | 36                            | 32                          | 33                                | 32                              | 121                           | 120                         | 83                         | 78                       | 15                            | 23                          | 191             | 186           | 9   | 367  | 78      | 0            | 1                 | 2             | 1            | 3           | 2           | 13                                        | 3           | 7                 |
| 36 | F       | 39  | 75      | 1,58    | 30,0 | 95  | 97  | 27,1    | 45     | 21                            | 21                          | 25                                | 24                              | 95                            | 81                          | 72                         | 62                       | 14                            | 14                          | 182             | 182           | 11  | 438  | 79      | 1            | 0                 | 3             | 2            | 5           | 3           | 5                                         | 3           | 5                 |
| 37 | M       | 34  | 71      | 1,75    | 23,2 | 88  | 87  | 41,2    | 70     | 52                            | 51                          | 43                                | 42                              | 157                           | 163                         | 78                         | 70                       | 15                            | 21                          | 181             | 187           | 19  | 578  | 84      | 1            | 1                 | 3             | 2            | 3           | 2           | 7                                         | 3           | 3                 |
| 38 | F       | 46  | 62      | 1,68    | 22,0 | 88  | 86  | 43,7    | 43     | 27                            | 24                          | 29                                | 26                              | 135                           | 120                         | 80                         | 80                       | 10                            | 14                          | 186             | 183           | 21  | 534  | 80      | 1            | 1                 | 2             | 1            | 4           | 0           | 10                                        | 2           | 5                 |
| 39 | M       | 27  | 85      | 1,75    | 27,8 | 94  | 98  | 36,7    | 65     | 49                            | 48                          | 44                                | 43                              | 123                           | 100                         | 90                         | 88                       | 14                            | 19                          | 188             | 188           | 6   | 567  | 70      | 2            | 1                 | 3             | 2            | 5           | 2           | 3                                         | 3           | 3                 |
| 40 | F       | 47  | 82      | 1,64    | 30,5 | 100 | 101 | 11,7    | 40     | 35                            | 33                          | 26                                | 26                              | 98                            | 90                          | 93                         | 90                       | 11                            | 10                          | 193             | 190           | 18  | 768  | 89      | 1            | 1                 | 2             | 2            | 3           | 1           | 3                                         | 3           | 5                 |
| 41 | F       | 35  | 75      | 1,68    | 26,6 | 95  | 95  | 38,4    | 48     | 37                            | 35                          | 40                                | 40                              | 115                           | 95                          | 70                         | 60                       | 10                            | 9                           | 187             | 187           | 19  | 524  | 83      | 1            | 1                 | 1             | 2            | 2           | 2           | 3                                         | 3           | 2                 |
| 42 | F       | 23  | 85      | 1,61    | 32,8 | 98  | 100 | 12,1    | 39     | 37                            | 35                          | 32                                | 32                              | 100                           | 90                          | 71                         | 60                       | 9                             | 9                           | 180             | 189           | 9   | 482  | 75      | 1            | 0                 | 3             | 1            | 3           | 3           | 12                                        | 3           | 5                 |

**S4 Table. Data from the Control Group at T<sub>1</sub>.**
